# Supplementary material for: An FFRCT diagnostic strategy versus usual care in patients with suspected coronary artery disease planned for invasive coronary angiography at German sites: one-year results of a subgroup analysis of the PLATFORM (Prospective Longitudinal Trial of FFRCT: Outcome and Resource Impacts) study
Source: PubMed Central journal article supplement — Open Heart. 2017 Mar 22;4(1):e000526. doi: 10.1136/openhrt-2016-000526 (PMC5471869; doi:10.1136/openhrt-2016-000526), 2017-03-22
Supplement: openhrt-2016-000526supp001.pdf [file openhrt-2016-000526supp001.pdf]

## Supplementary data

### **An FFR<sub>CT</sub> diagnostic strategy versus usual care in patients with suspected coronary artery disease planned for invasive coronary angiography at German sites: one-year results of a subgroup analysis of the PLATFORM (Prospective Longitudinal Trial of FFR<sub>CT</sub>: Outcome and Resource IMpacts) study**

Authors: Roisin Colleran<sup>1</sup>, Pamela S. Douglas<sup>2</sup>, Martin Hadamitzky<sup>1</sup>, Matthias Gutberlet<sup>3</sup>, Lukas Lehmkuhl<sup>3</sup>, Borek Foldyna<sup>3</sup>, Michael Woinke<sup>4</sup>, Ulrich Hink<sup>5</sup>, Jonathan Nadjiri<sup>1</sup>, Alan Wilk<sup>6</sup>, Furong Wang<sup>6</sup>, Gianluca Pontone<sup>7</sup>, Mark A. Hlatky<sup>8</sup>, Campbell Rogers<sup>6</sup>, Robert A. Byrne<sup>1</sup> on behalf of the PLATFORM Investigators

From: <sup>1</sup>Deutsches Herzzentrum München, Technische Universität München, Munich, Germany, <sup>2</sup>Duke Clinical Research Institute, Duke University School of Medicine, Durham, NC, USA, <sup>3</sup>Department of Diagnostic and Interventional Radiology, University of Leipzig Heart Centre, Leipzig, Germany, <sup>4</sup>Department of Cardiology, University of Leipzig Heart Centre, Leipzig, Germany, <sup>5</sup>Department of Cardiology, Johannes Gutenberg University Hospital, Mainz, Germany, <sup>6</sup>HeartFlow, Redwood City, CA, USA, <sup>7</sup>Centro Cardiologico Monzino, IRCCS, University of Milan, Milan, Italy, <sup>8</sup>Department of Health Research and Policy, Stanford University School of Medicine, Stanford, CA, USA.

Brief title: 1-year follow-up of the PLATFORM study – a German subgroup analysis

Word count: 141

Supplementary online table: 1, supplementary online figure: 1

Spell check: English (UK)

Funding was provided by HeartFlow, Inc., Redwood City, CA, USA

Clinicaltrials.gov registration number: NCT01943903.

Address for correspondence:

Robert A. Byrne, MB, BCh, PhD

Deutsches Herzzentrum München

Lazarettstrasse, 36, Munich, Germany

Telephone: + 49-89-1218-4578; fax: + 49-89-1218-4573;

e-mail: byrne@dhm.mhn.de

**Supplementary table 1. Cost weights based on German 2016 reimbursement (euro)**

| <b>Resource</b>                   | <b>Cost weight (euro)</b> | <b>GOÄ or G-DRG code</b> |
|-----------------------------------|---------------------------|--------------------------|
| <b>Stress testing</b>             |                           |                          |
| Exercise ECG                      | 60                        | 652                      |
| Stress echo                       | 296                       | A629                     |
| Stress perfusion imaging          | 504                       | 5424, 5487               |
| <b>Coronary CTA</b>               | <b>340</b>                | <b>5371, 5376, 5377</b>  |
| <b>Magnetic resonance imaging</b> | <b>603</b>                | <b>5715</b>              |
| <b>Invasive tests</b>             |                           |                          |
| Coronary angiography              | 2,149                     | F49G                     |
| FFR <sub>inv</sub>                | 785                       | F49F                     |
| Intravascular ultrasound          | 785                       | F49F                     |
| <b>Coronary revascularization</b> |                           |                          |
| PCI (1 vessel)                    | 3,074                     | F58B                     |
| PCI (2 vessels)                   | 4,054                     | F56B                     |
| Drug-eluting stents (per stent)   | 120                       | ZE101                    |
| CABG                              | 14,059                    | F06F                     |
| PCI complication                  | 3,153                     | F58A-F58B <sup>†</sup>   |
| CABG complication                 | 3,468                     | F06E-F06F <sup>†</sup>   |
| <b>Visits</b>                     |                           |                          |
| Clinic                            | 108                       | 99214                    |
| Emergency department              | 119                       | 99284                    |

All costs are shown in euro rounded to the nearest whole number.

CABG=coronary artery bypass grafting; CTA=computed tomographic angiography;

ECG=electrocardiogram; FFR<sub>inv</sub>= fractional flow reserve determined by invasive coronary

angiography; G-DRG=German Diagnosis-Related Group; GOÄ= German doctor's fee schedule;

ICA=invasive coronary angiography; PCI=percutaneous coronary intervention.

<sup>†</sup>DRG code.

<sup>‡</sup>Difference between DRG codes with and without major complicating conditions

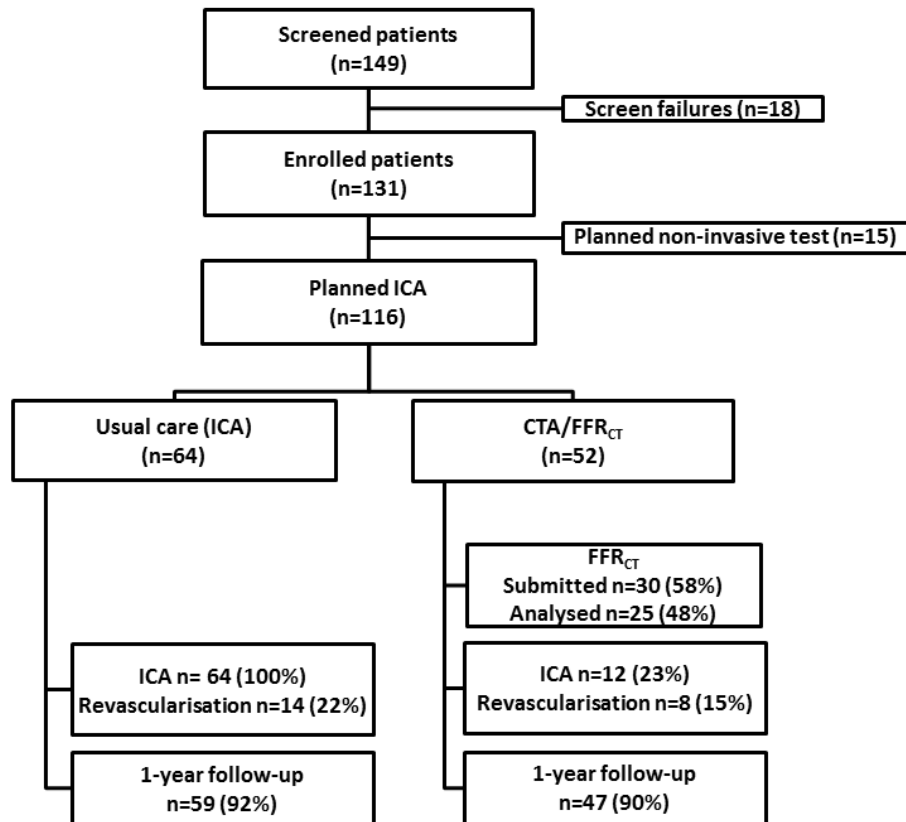

**Supplementary figure 1. Flow chart showing screening and enrolment of patients in the German subgroup of the PLATFORM study**

CTA = computed tomography angiography; ICA = invasive coronary angiography; FFR<sub>CT</sub> = fractional flow reserve estimated using computed tomography
